# Supplementary material for: Arabidopsis Transporter ABCG37/PDR9 contributes primarily highly oxygenated Coumarins to Root Exudation
Source: PubMed Central journal article supplement (PMC5473935; doi:10.1038/s41598-017-03250-6), 2017-06-16
Supplement: 41598_2017_3250_MOESM1_ESM.pdf [file 41598_2017_3250_MOESM1_ESM.pdf]

## **Supplementary Information**

### **Arabidopsis Transporter ABCG37/PDR9 contributes primarily highly oxygenated Coumarins to Root Exudation**

Jörg Ziegler<sup>1,\*</sup>, Stephan Schmidt<sup>2</sup>, Nadine Strehmel<sup>2</sup>, Dierk Scheel<sup>2</sup>, and Steffen Abel<sup>1,3,4</sup>

<sup>1</sup> Department of Molecular Signal Processing, Leibniz Institute of Plant Biochemistry, D-06120 Halle (Saale), Germany

<sup>2</sup> Department of Stress and Developmental Biology, Leibniz Institute of Plant Biochemistry, D-06120 Halle (Saale), Germany

<sup>3</sup> Institute of Biochemistry and Biotechnology, Martin Luther University Halle Wittenberg, D-06120 Halle (Saale), Germany

<sup>4</sup> Department of Plant Sciences, University of California-Davis, Davis, CA 95616, USA

## Supplementary Figure S1

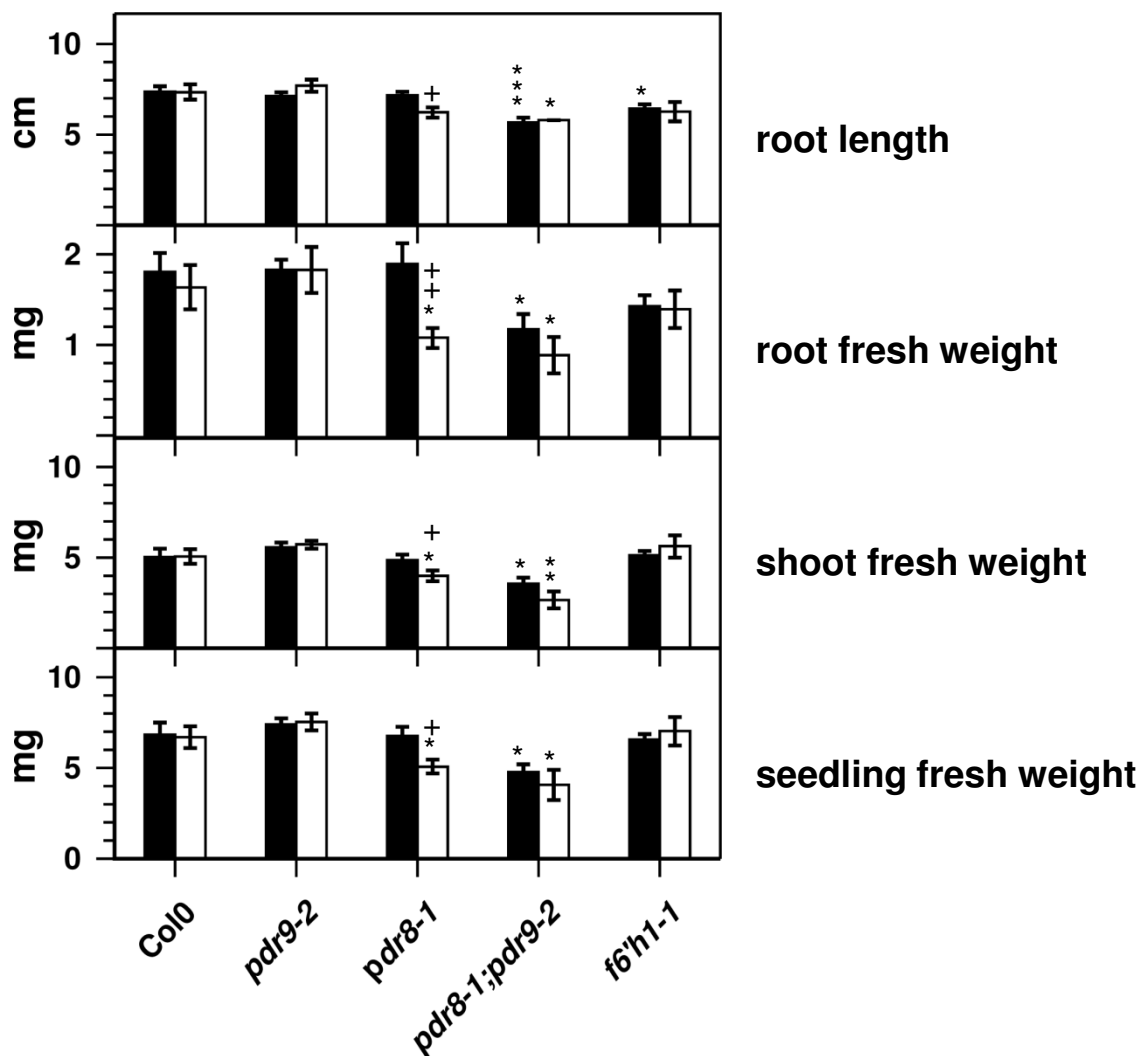

**Supplementary Figure S1.** seedling, shoot, root fresh weights and root lengths of 11 days old seedlings, either grown in full medium (+Fe) (solid bars), or after transfer to -Fe medium (open bars) at day 4. Error bars denote SEM ( $n=8$  for fresh weights,  $n=16$  for root lengths; for *pdr8-1;pdr9-2* root length -Fe:  $n=5$ ). Significance analysis was performed by Student's *t*-test (two tailed, equal variance). \*:  $P \leq 0.05$ ; \*\*:  $P \leq 0.01$  \*\*\*:  $P \leq 0.001$  for comparison between mutants and Col0; + :  $P \leq 0.05$ ; ++ :  $P \leq 0.01$  between + and - Fe treatment

## Supplementary Figure S2

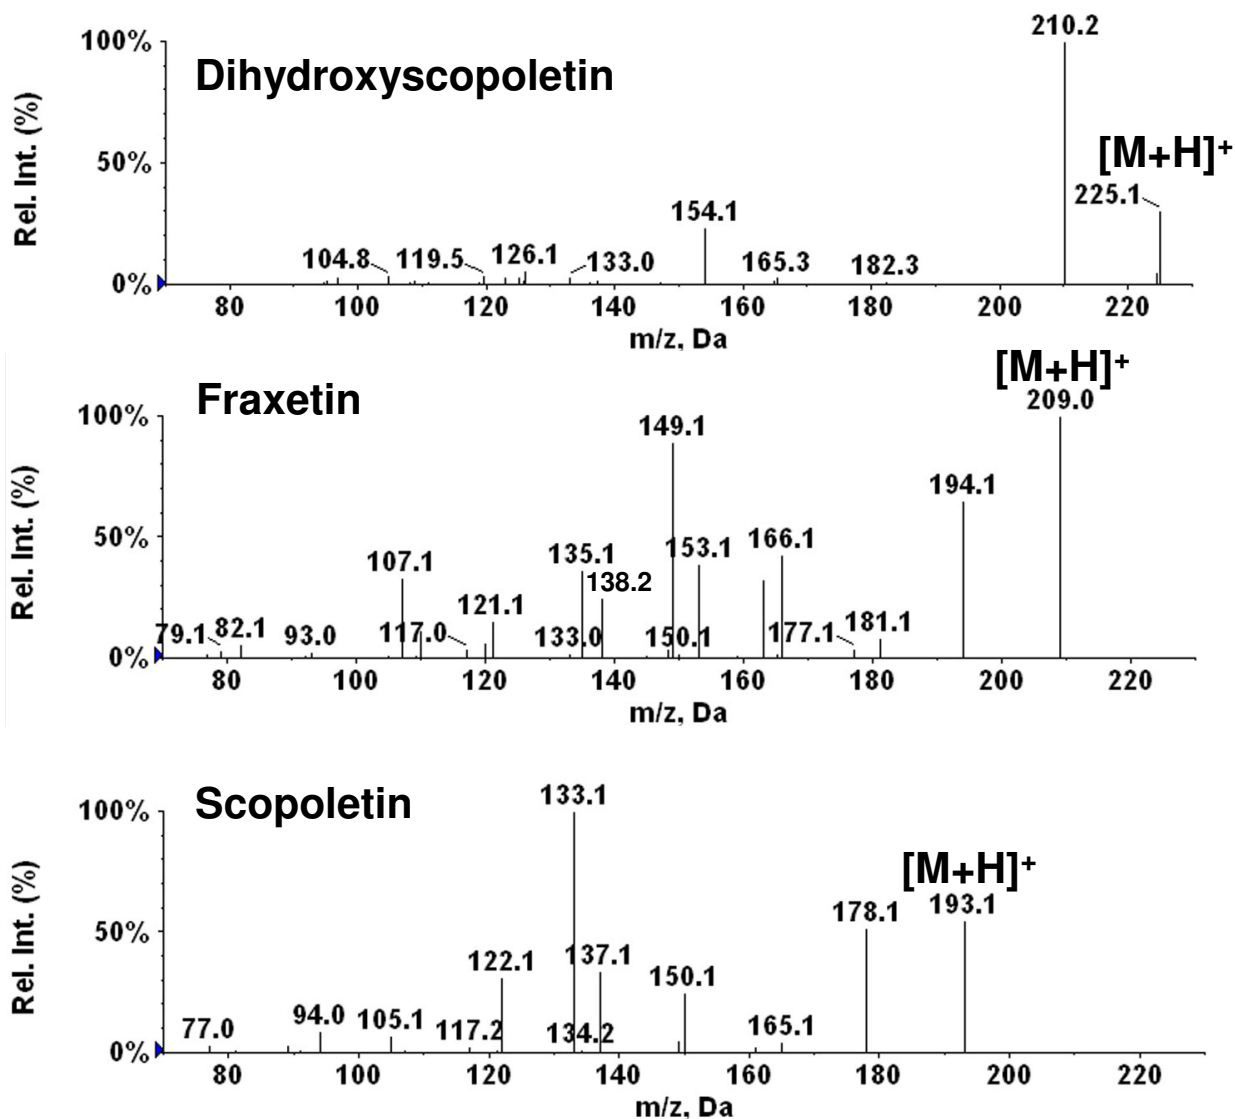

**Supplementary Figure S2.** MS<sup>2</sup> spectra of the authenticated standards fraxetin, scopoletin, and of the compound tentatively assigned as dihydroxyscopoletin. The mass spectrum of the tentative dihydroxyscopoletin was recorded at a retention time of 2.5 min after the injection of an exudate sample showing a strongly increased signal for *m/z* 225 Da after seedlings have been exposed to Fe-deficiency. All spectra were recorded using a collision energy of 30V in the positive ionization mode.

**Supplementary Fig. S3: The hydroponic system used in this study**

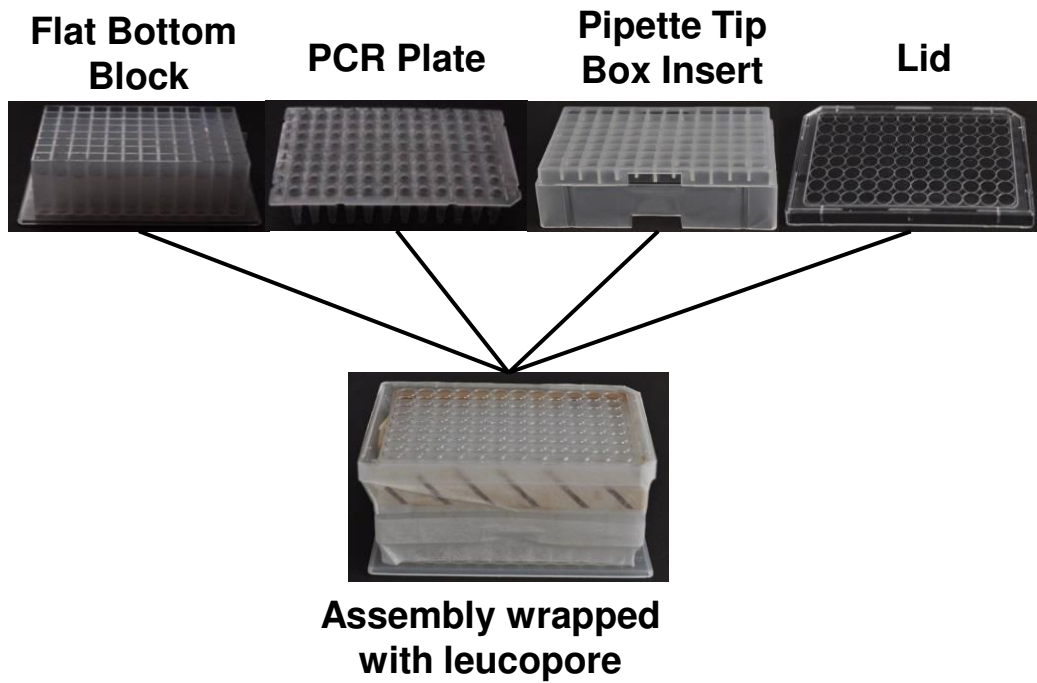

**Supplementary Fig. S3: Assembly of the hydroponic system.**

## Supplementary Table S1:

Number of datasets for each genotype

| experiment | ionization | Col0 | <i>abcg36</i><br>( <i>pdr8-1</i> ) | <i>abcg37</i><br>( <i>pdr9-2</i> ) | <i>abcg36;abcg37</i><br>( <i>pdr8-1;pdr9-2</i> ) | blanks |
|------------|------------|------|------------------------------------|------------------------------------|--------------------------------------------------|--------|
| 1          | positive   | 5    | 5                                  | 4                                  | 1                                                | 5      |
|            | negative   | 5    | 5                                  | 4                                  | 1                                                | 5      |
| 2          | positive   | 4    | 5                                  | 4                                  | 1                                                | 5      |
|            | negative   | 4    | 5                                  | 4                                  | 1                                                | 5      |
| 3          | positive   | 4    | 5                                  | 5                                  | 4                                                | 5      |
|            | negative   | 4    | 5                                  | 5                                  | 4                                                | 5      |
| $\Sigma$   | positive   | 13   | 15                                 | 13                                 | 6                                                | 15     |
|            | negative   | 13   | 15                                 | 13                                 | 6                                                | 15     |

*pdr8-1*: SALK\_000578<sup>1</sup>

*pdr9-2*: SALK\_050885<sup>2</sup>

*pdr8-1;pdr9-2*<sup>3</sup>

- 1 Kobae, Y. *et al.* Loss of AtPDR8, a plasma membrane ABC transporter of *Arabidopsis thaliana*, causes hypersensitive cell death upon pathogen infection. *Plant Cell Physiol.* **47**, 309-318 (2006).
- 2 Ito, H. & Gray, W. M. A gain-of-function mutation in the *Arabidopsis* pleiotropic drug resistance transporter PDR9 confers resistance to auxinic herbicides. *Plant Physiol.* **142**, 63-74 (2006).
- 3 Růžička, K. *et al.* *Arabidopsis* PIS1 encodes the ABCG37 transporter of auxinic compounds including the auxin precursor indole-3-butyric acid. *Proc. Natl. Acad. Sci. USA* **107**, 10749-10753 (2010).

**Supplementary Table S2** MS parameters for MRM-transitions

| Coumarins                      |                 |                     |                                |                            |                                  |                             |                              |
|--------------------------------|-----------------|---------------------|--------------------------------|----------------------------|----------------------------------|-----------------------------|------------------------------|
|                                | MRM transitions | Retention time, min | Declustering potential (DP), V | Entrance potential (EP), V | Cell entrance potential (CEP), V | Collision potential (CE), V | Cell exit potential (CEX), V |
| 4-Methyl umbelliferon          | <b>177→103</b>  | 3.8                 | 51                             | 3.5                        | 10                               | 33                          | 4                            |
|                                | <i>177→105</i>  |                     | 51                             | 3.5                        | 10                               | 27                          | 4                            |
| Esculetin                      | <b>179→123</b>  | 2.5                 | 51                             | 10.5                       | 14                               | 31                          | 4                            |
|                                | <i>179→133</i>  |                     | 51                             | 10.5                       | 14                               | 27                          | 4                            |
| Esculin                        | <b>341→179</b>  | 2.0                 | 46                             | 4.5                        | 22                               | 23                          | 4                            |
|                                | <i>341→123</i>  |                     | 46                             | 4.5                        | 22                               | 59                          | 4                            |
| Scopoletin                     | <b>193→133</b>  | 3.2                 | 51                             | 3.5                        | 12                               | 29                          | 4                            |
|                                | <i>193→178</i>  |                     | 51                             | 3.5                        | 12                               | 29                          | 4                            |
| Scopolin                       | <b>355→193</b>  | 2.4                 | 26                             | 4.5                        | 24                               | 19                          | 4                            |
|                                | <i>355→133</i>  |                     | 26                             | 4.5                        | 24                               | 55                          | 4                            |
| Dihydroxy scopoletin           | <b>225→210</b>  | 2.5                 | 25                             | 9                          | 15                               | 30                          | 4                            |
|                                | <i>225→136</i>  |                     | 25                             | 9                          | 15                               | 30                          | 4                            |
| Dihydroxy scopoletin-glucoside | <b>387→225</b>  | 2.3                 | 30                             | 3                          | 20                               | 20                          | 4                            |
|                                | <i>387→210</i>  |                     | 30                             | 3                          | 20                               | 45                          | 4                            |
| Fraxin                         | <b>371→209</b>  | 2.5                 | 26                             | 2.5                        | 18                               | 19                          | 4                            |
|                                | <i>371→194</i>  |                     | 26                             | 2.5                        | 18                               | 49                          | 4                            |
| Fraxetin                       | <b>209→149</b>  | 2.8                 | 51                             | 4.5                        | 8                                | 29                          | 4                            |
|                                | <i>209→194</i>  |                     | 51                             | 4.5                        | 8                                | 27                          | 4                            |
| Isofraxidin                    | <b>223→162</b>  | 3.4                 | 51                             | 4.5                        | 14                               | 33                          | 4                            |
|                                | <i>223→190</i>  |                     | 51                             | 4.5                        | 14                               | 29                          | 4                            |

Quantifier and qualifier transitions are indicated in bold and italics,
